# Supplementary material
Source: publisher figshare collection journal article supplement (https://acs.figshare.com/ndownloader/files/11634806)
Supplement: Supplementary file 1 [file 11634806]

# Supporting Informations

## Self-Assembled Pd<sup>II</sup><sub>6</sub> Molecular Spheroids and their Proton Conduction Property

Rupak Saha<sup>a</sup>, Alope Kumar Ghosh<sup>a</sup>, Rudra Narayan Samajdar<sup>b</sup> and Partha Sarathi Mukherjee<sup>a\*</sup>

<sup>a</sup> *Department of Inorganic and Physical Chemistry, Indian Institute of Science, Bangalore-560012, India. E-mail: [psm@iisc.ac.in](mailto:psm@iisc.ac.in)*

<sup>b</sup> *Solid State and Structural Chemistry Unit, Indian Institute of Science, Bangalore-560012, India.*

**Table S1.** Crystallographic Data and Refinement Parameters of **SP1** and **SP3**.

| Identification code            | <b>SP1</b>                                                                                                   | <b>SP3</b>                                                                                                 |
|--------------------------------|--------------------------------------------------------------------------------------------------------------|------------------------------------------------------------------------------------------------------------|
| Empirical formula              | C <sub>144</sub> H <sub>120</sub> N <sub>60</sub> O <sub>36</sub> Pd <sub>6</sub>                            | C <sub>216</sub> H <sub>168</sub> N <sub>50</sub> O <sub>20</sub> Pd <sub>6</sub>                          |
| Formula weight                 | 3905.39                                                                                                      | 4422.39                                                                                                    |
| Temperature (k)                | 100 (2)                                                                                                      | 100 (2)                                                                                                    |
| Wavelength                     | 0.70000                                                                                                      | 0.71073                                                                                                    |
| Crystal system                 | monoclinic                                                                                                   | monoclinic                                                                                                 |
| Space group                    | P21/ <i>n</i>                                                                                                | C 2/ <i>m</i>                                                                                              |
| Unit cell dimension            | a = 18.524 (4)<br>b = 34.021 (7)<br>c = 23.246 (5)<br>$\alpha$ = 90<br>$\beta$ = 108.71 (3)<br>$\gamma$ = 90 | a= 32.038 (3)<br>b= 30.653 (3)<br>c= 26.205 (3)<br>$\alpha$ = 90<br>$\beta$ = 110.896 (3)<br>$\gamma$ = 90 |
| Volume (Å <sup>3</sup> )       | 13876 (5)                                                                                                    | 24043 (4)                                                                                                  |
| Z                              | 2                                                                                                            | 2                                                                                                          |
| $\delta$ (g/cm <sup>-3</sup> ) | 0.935                                                                                                        | 0.611                                                                                                      |
| Mu (mm <sup>-1</sup> )         | 0.436                                                                                                        | 0.253                                                                                                      |
| F(000)                         | 3936.0                                                                                                       | 4500.0                                                                                                     |
| GooF                           | 1.081                                                                                                        | 1.017                                                                                                      |
| R                              | 0.0894                                                                                                       | 0.1010                                                                                                     |
| wR2                            | 0.2920                                                                                                       | 0.3156                                                                                                     |
| CCDC no.                       | 1813498                                                                                                      | 1813499                                                                                                    |

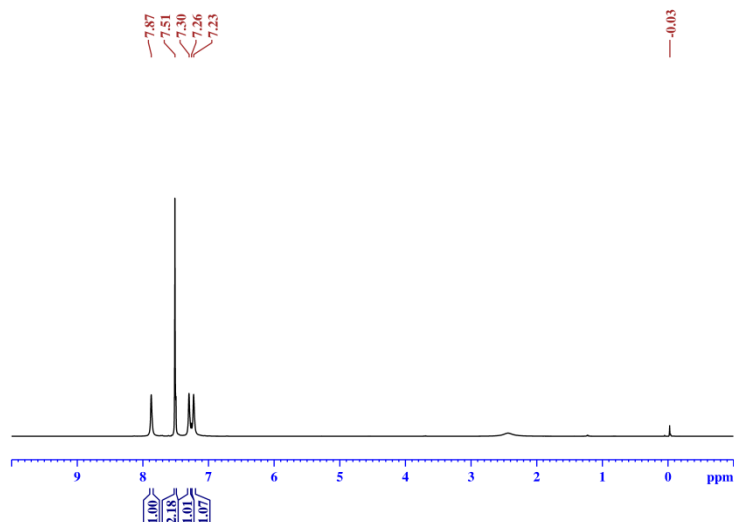**Figure S1.** <sup>1</sup>H NMR spectra of the **L1** in CDCl<sub>3</sub> at room temperature.



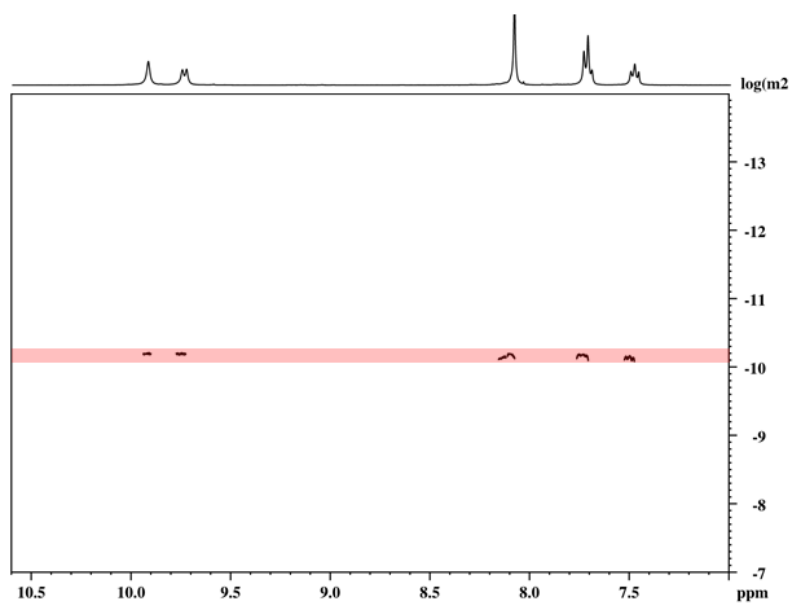

**Figure S5.** DOSY NMR spectra of **SP2** in DMSO- $d_6$  at room temperature.

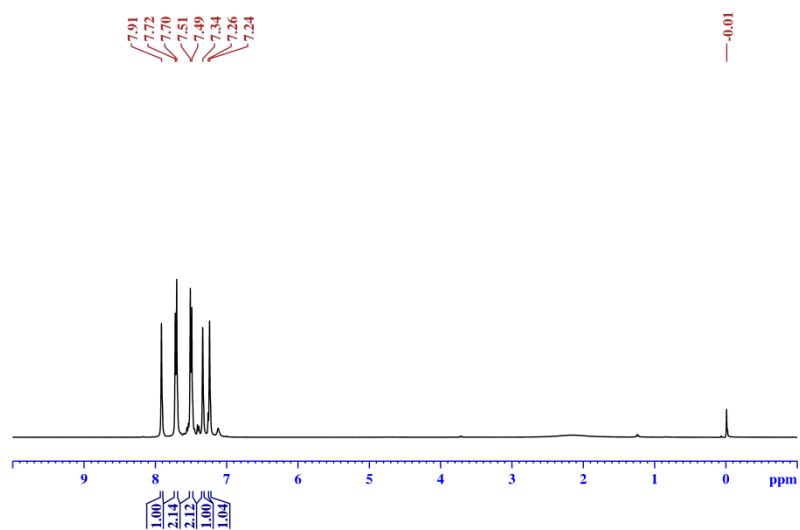

**Figure S6.**  $^1\text{H}$  NMR spectra of the **L3** in  $\text{CDCl}_3$  at room temperature.

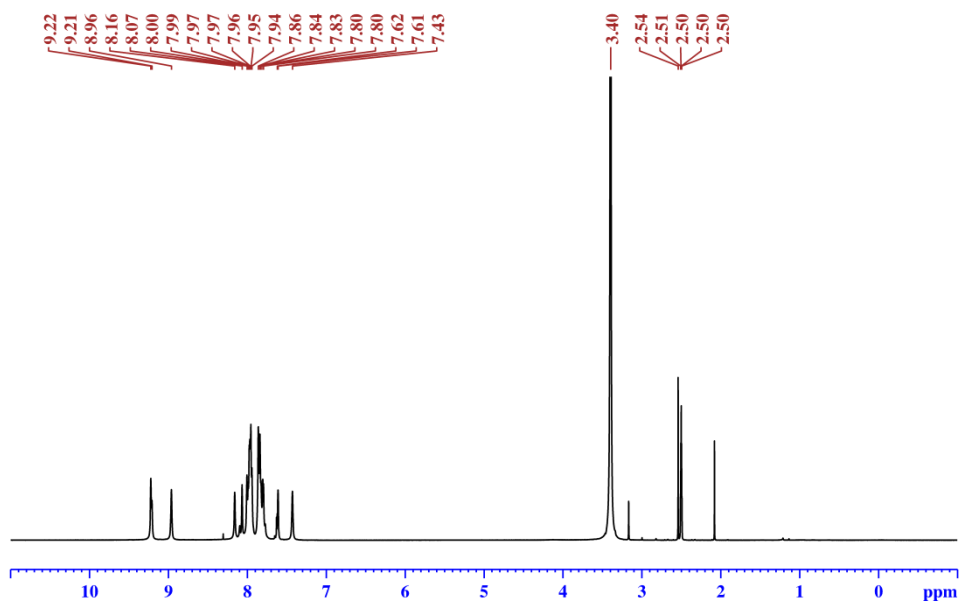

**Figure S7.**  $^1\text{H}$  NMR spectra of the **SP3** in  $\text{DMSO-d}_6$  at  $20\text{ }^\circ\text{C}$ .

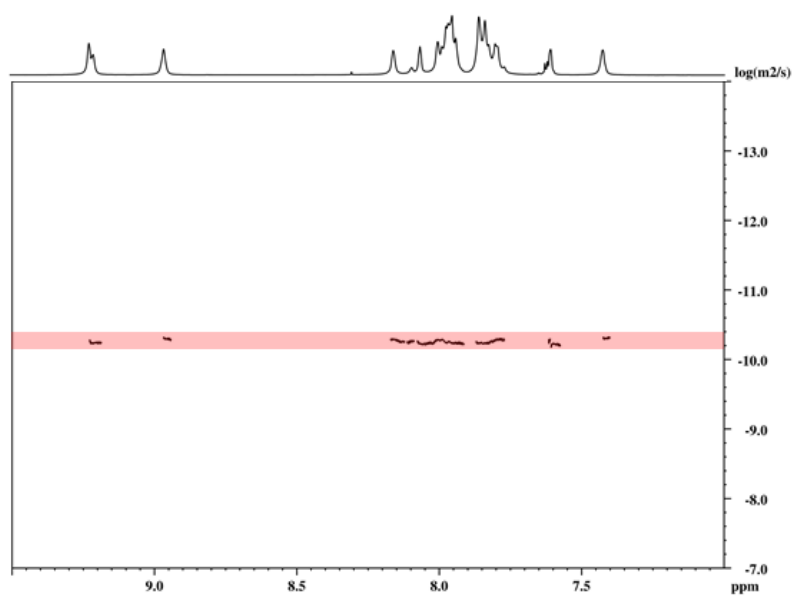

**Figure S8.** DOSY NMR spectra of **SP3** in  $\text{DMSO-d}_6$  at  $20\text{ }^\circ\text{C}$ .

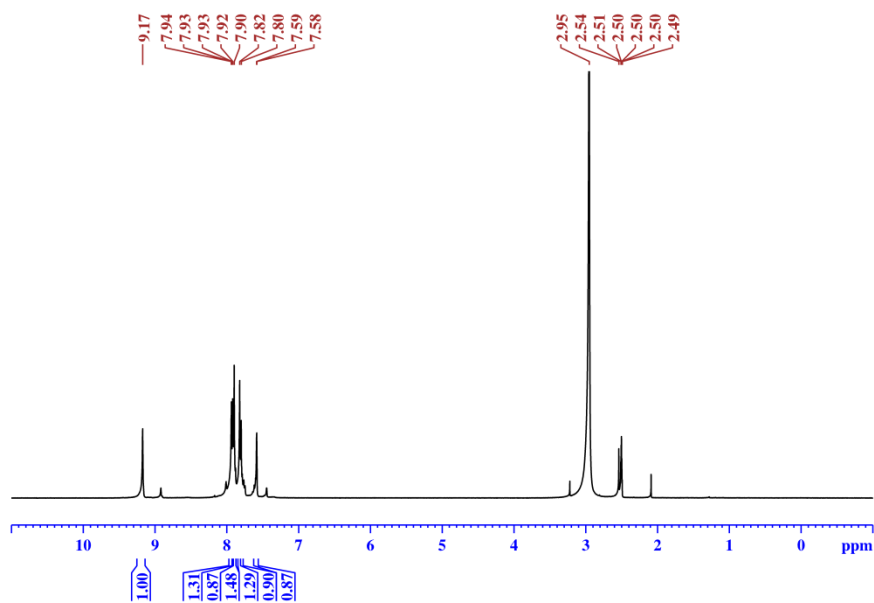

**Figure S9.** <sup>1</sup>H NMR spectra of **SP3** in DMSO-d<sub>6</sub> at 100 °C.

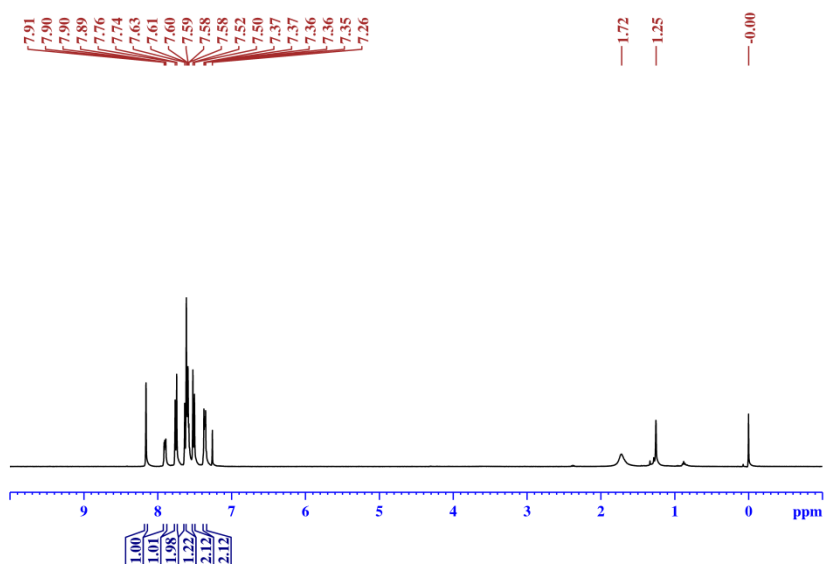

**Figure S10.** <sup>1</sup>H NMR spectra of the **L4** in CDCl<sub>3</sub> at room temperature.

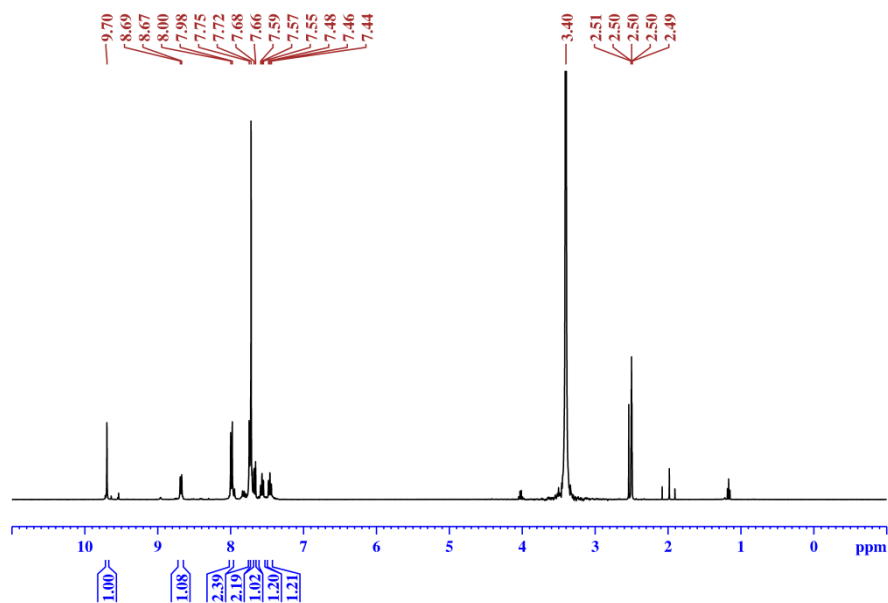

**Figure S11.**  $^1\text{H}$  NMR spectra of **SP4** in  $\text{DMSO-d}_6$  at room temperature.

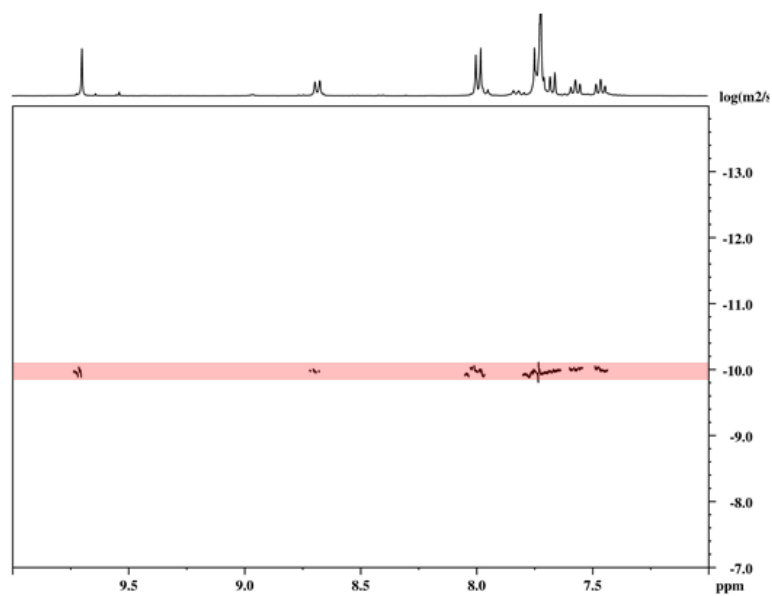

**Figure S12.** DOSY NMR spectra of **SP4** in  $\text{DMSO-d}_6$  at room temperature.

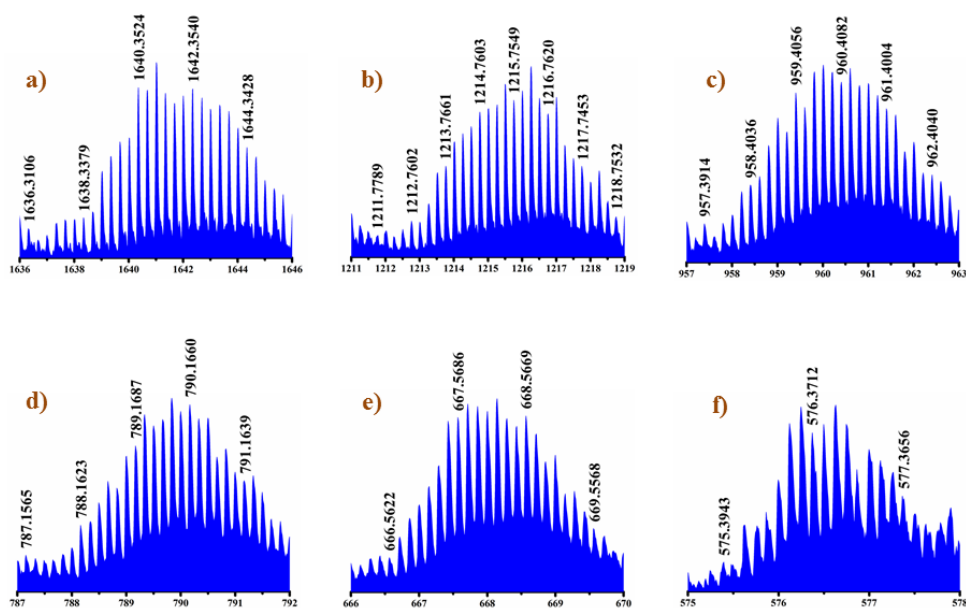

**Figure S13.** Experimental isotopic distribution patterns of the peaks corresponding to  $[\text{SP2-3NO}_3]^{3+}$  (a);  $[\text{SP2-4NO}_3]^{4+}$  (b);  $[\text{SP2-5NO}_3]^{5+}$  (c);  $[\text{SP2-6NO}_3]^{6+}$  (d);  $[\text{SP2-7NO}_3]^{7+}$  (e) and  $[\text{SP2-8NO}_3]^{8+}$  (f).

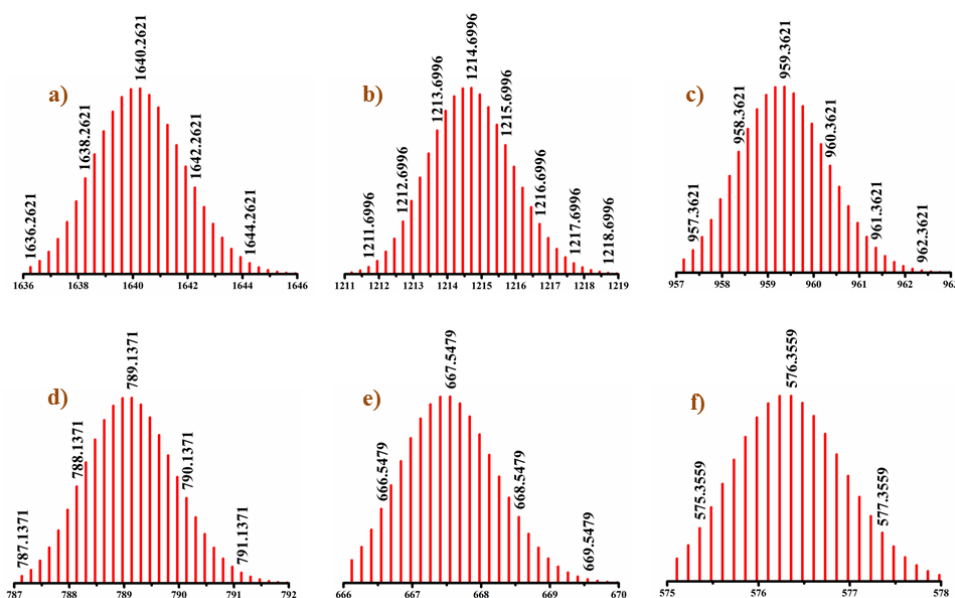

**Figure S14.** Calculated isotopic distribution patterns of the peaks corresponding to  $[\text{SP2-3NO}_3]^{3+}$  (a);  $[\text{SP2-4NO}_3]^{4+}$  (b);  $[\text{SP2-5NO}_3]^{5+}$  (c);  $[\text{SP2-6NO}_3]^{6+}$  (d);  $[\text{SP2-7NO}_3]^{7+}$  (e) and  $[\text{SP2-8NO}_3]^{8+}$  (f).



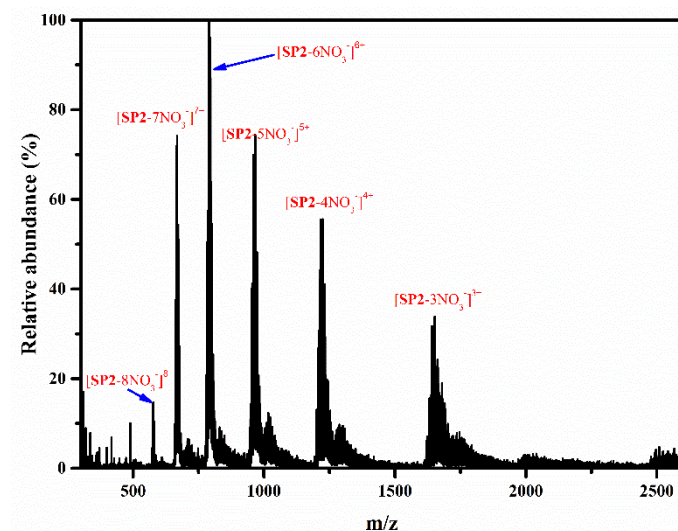

**Figure S15.** Full mass spectra of SP2.

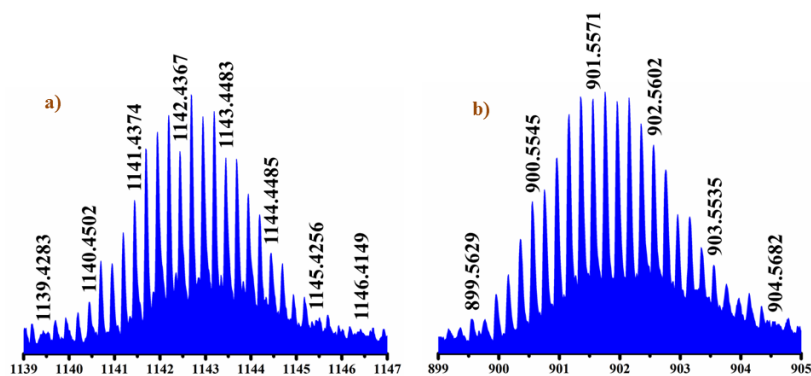

**Figure S16.** Experimental isotopic distribution patterns of the peaks corresponding to [SP3-4NO<sub>3</sub>]<sup>4+</sup> (a) and [SP3-5NO<sub>3</sub>]<sup>5+</sup> (c).

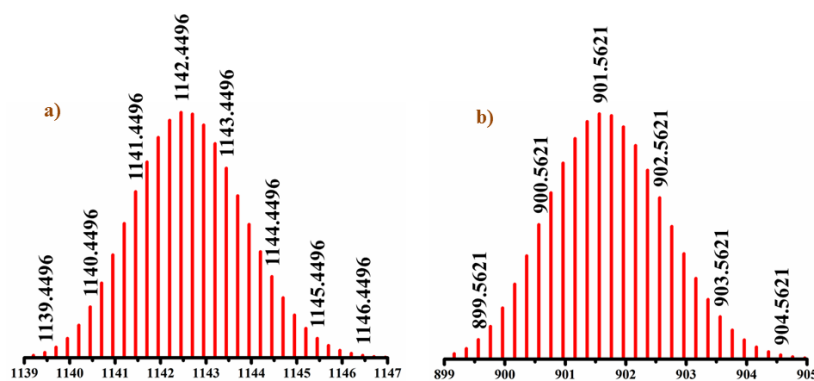

**Figure S17.** Calculated isotopic distribution patterns of the peaks corresponding to [SP3-4NO<sub>3</sub>]<sup>4+</sup> (a) and [SP3-5NO<sub>3</sub>]<sup>5+</sup> (b).

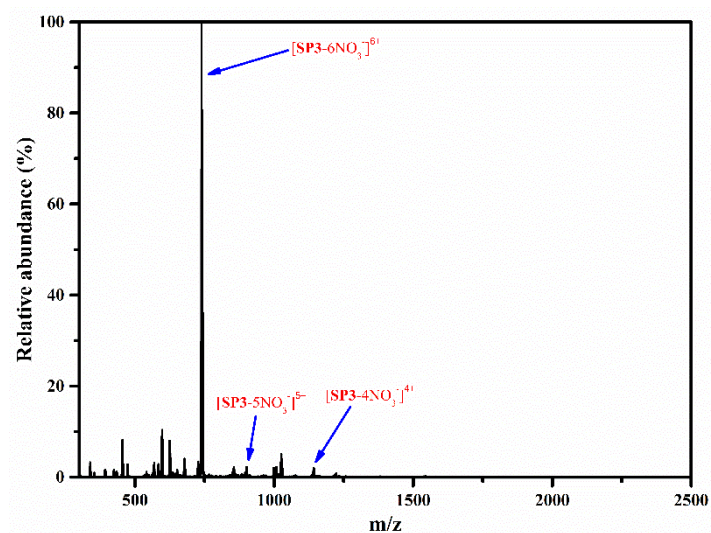

**Figure S18.** Full mass spectra of SP3.

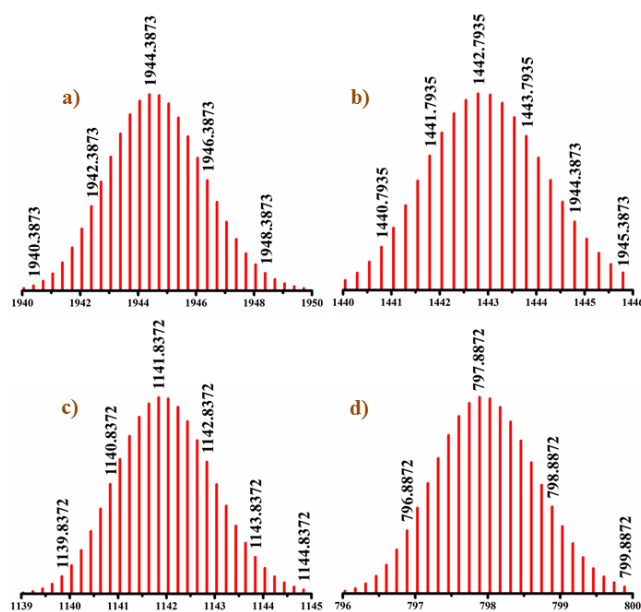

**Figure S19.** Calculated isotopic distribution patterns of the peaks corresponding to  $[\text{SP4-3NO}_3]^{3+}$  (a);  $[\text{SP4-4NO}_3]^{4+}$  (b);  $[\text{SP4-5NO}_3]^{5+}$  (c) and  $[\text{SP4-7NO}_3]^{7+}$  (d).

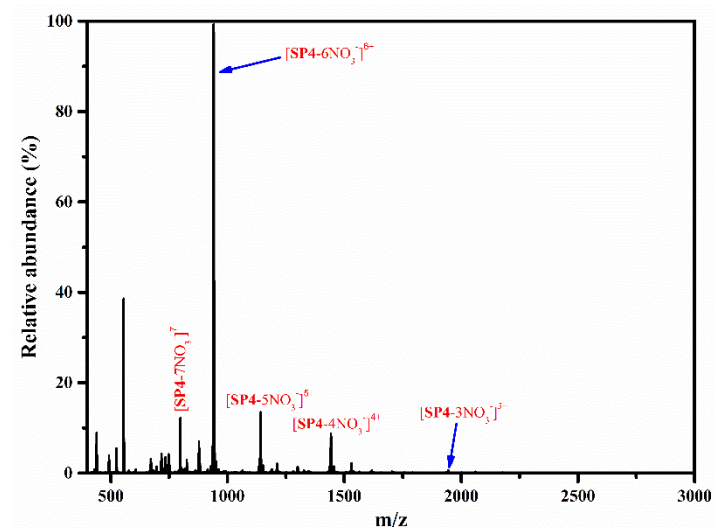

**Figure S20.** Full mass spectra of SP4.

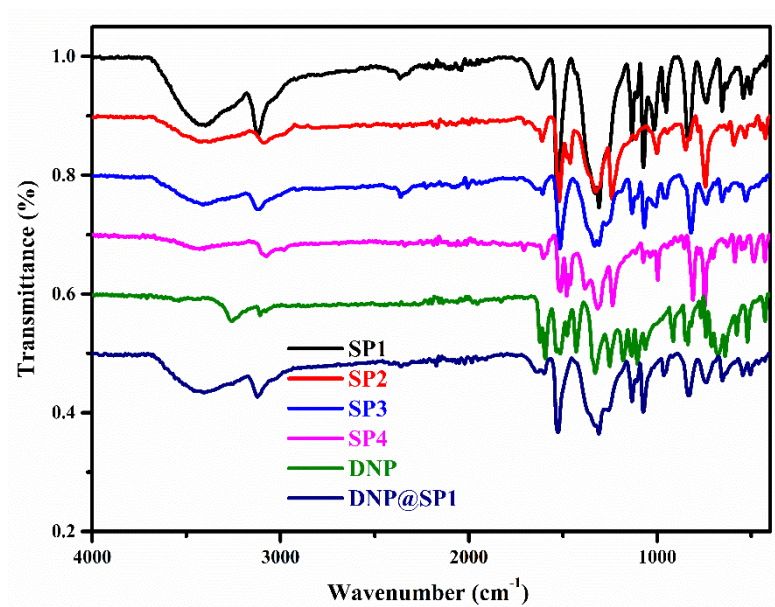

**Figure S21.** IR spectra of molecular spheroids SP1, SP2, SP3, SP4, DNP and adsorbed DNP in spheroid SP1 (DNP@SP1).

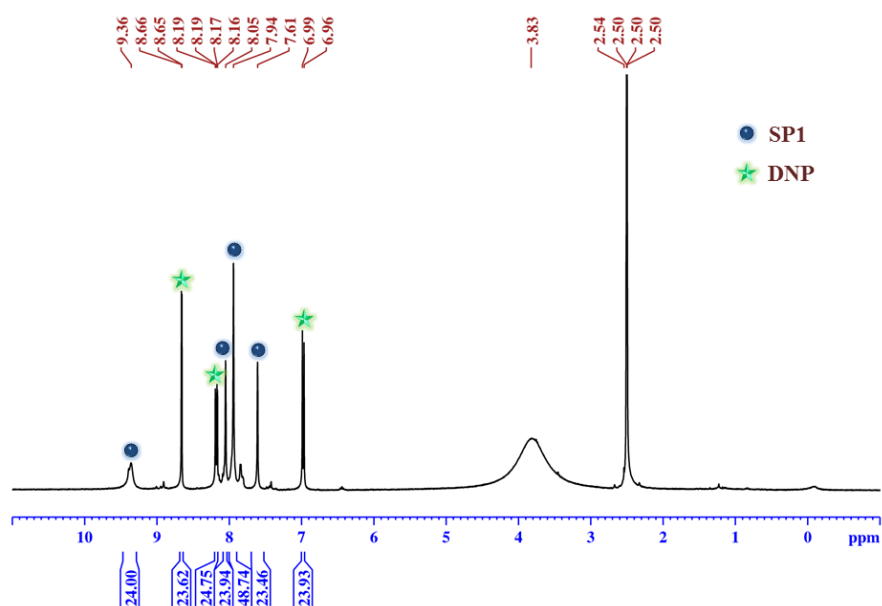

**Figure S22.**  $^1\text{H}$  NMR spectra of **DNP@SP1** in  $\text{DMSO-d}_6$  at room temperature containing 24 **DNP** molecules.

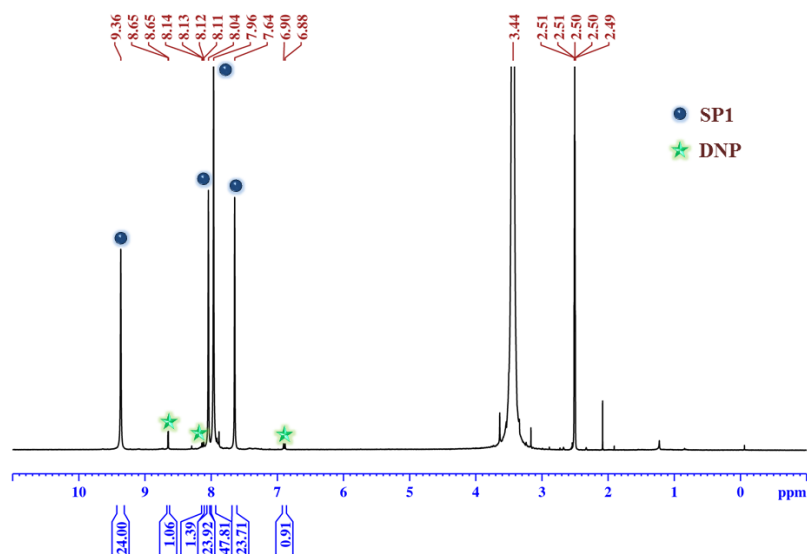

**Figure S23.**  $^1\text{H}$  NMR spectra of **DNP@SP1** in  $\text{DMSO-d}_6$  at room temperature containing one **DNP** molecule.

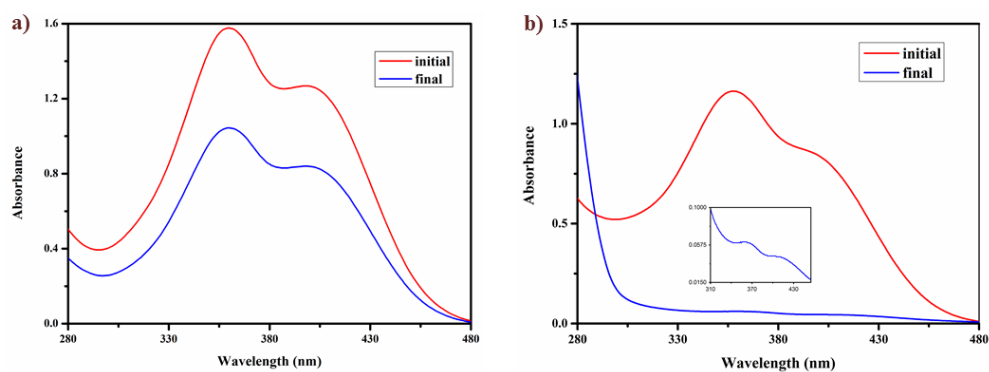

**Figure S24.** UV-Vis Spectra of EtOH:H<sub>2</sub>O (1:9) 2,4-DNP solution starting with 0.5 mmol **DNP** molecule (a) and 0.01 mmol **DNP** molecule (b).

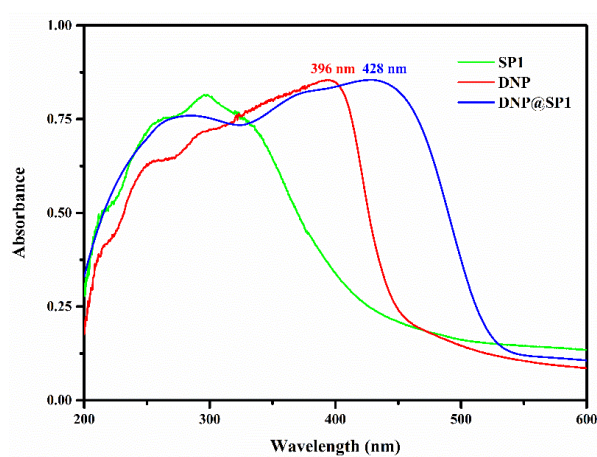

**Figure S25.** Solid state UV-Vis spectra of **SP1**, **DNP** and adsorped **DNP** in spheroid **SP1** (**DNP@SP1**).

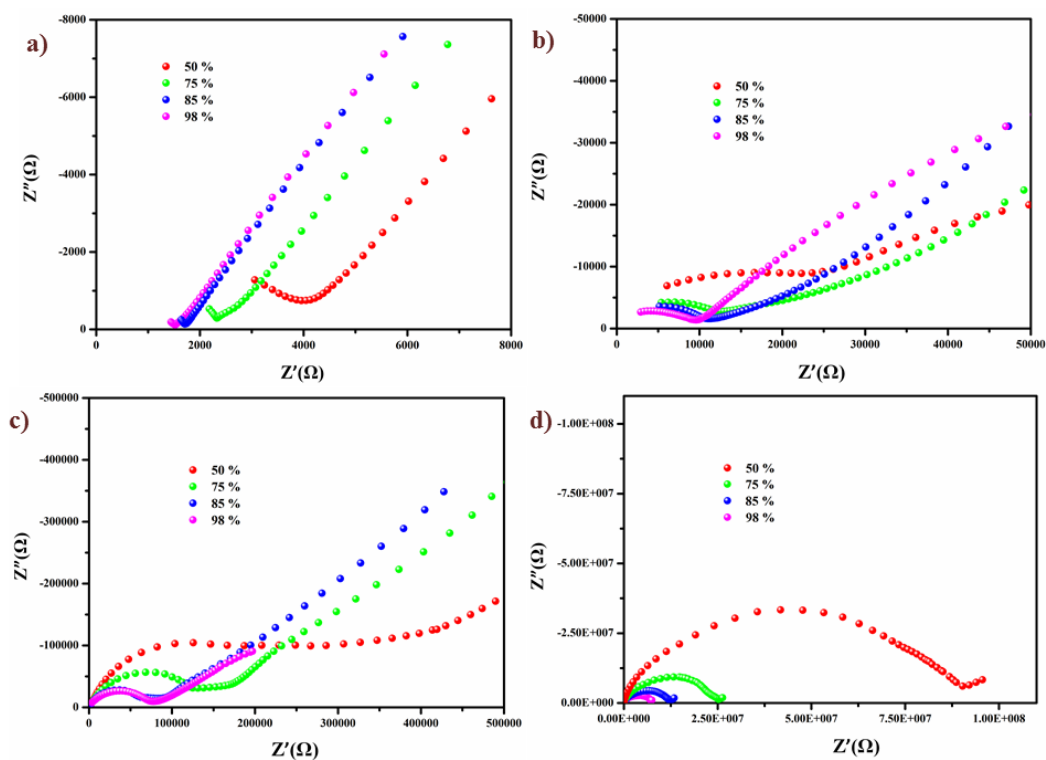

**Figure S26.** Nyquist plots of SP1 (a), SP2 (b), SP3 (c) and SP4 (d) at 20 °C and different relative humidity.

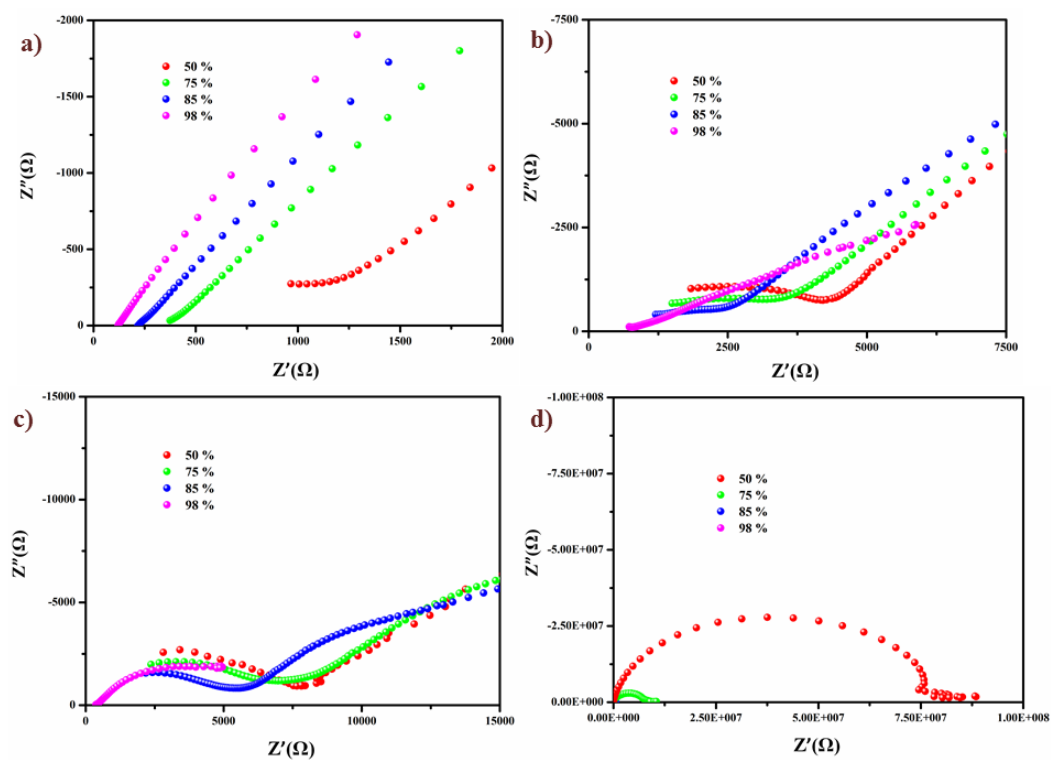

**Figure S27.** Nyquist plots of SP1 (a), SP2 (b), SP3 (c) and SP4 (d) at 70 °C and different relative humidity.

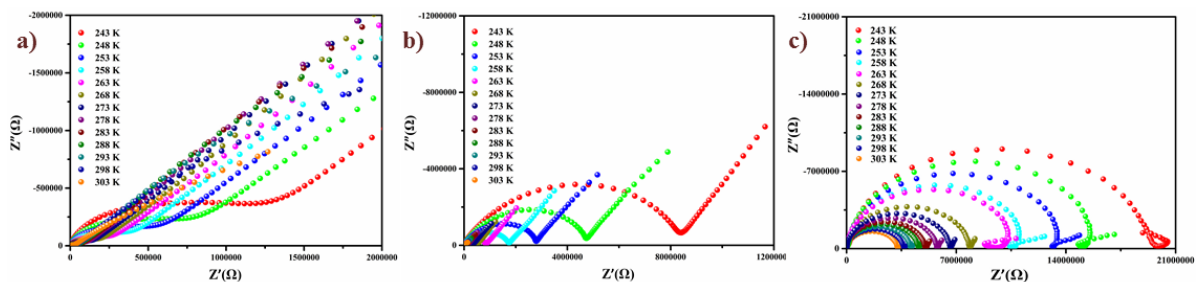

**Figure S28.** Nyquist plots of **SP1** (a), **DNP** (b) and **DNP@SP1** (c) between 243 K to 303 K.

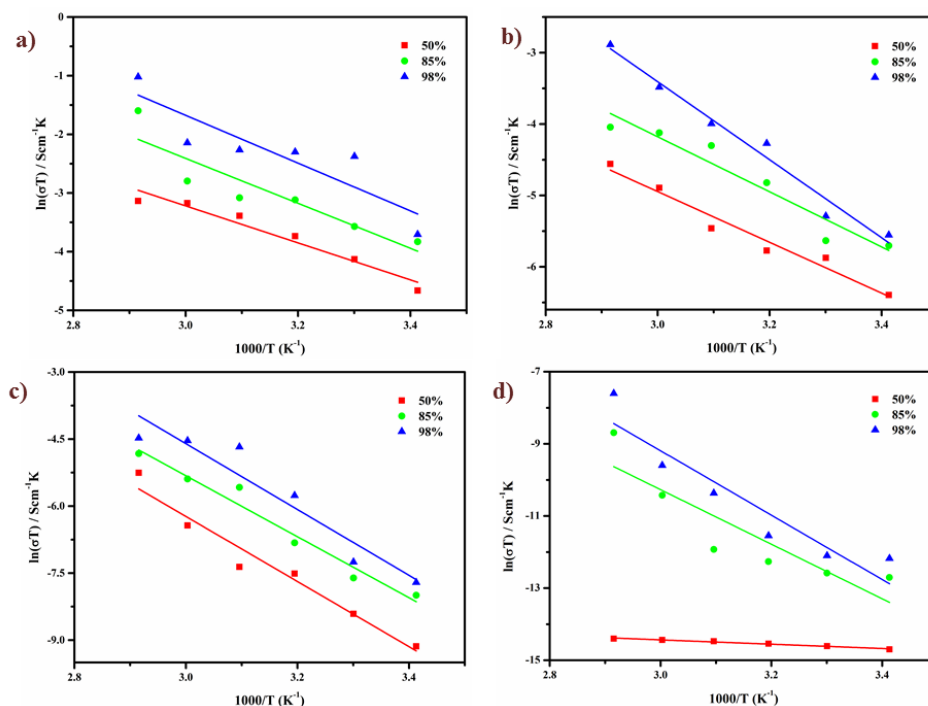

**Figure S29.** Arrhenius plot of proton conductivity for **SP1** (a), **SP2** (b), **SP3** (c) and **SP4** (d) at 50%, 85% and 98% relative humidity.

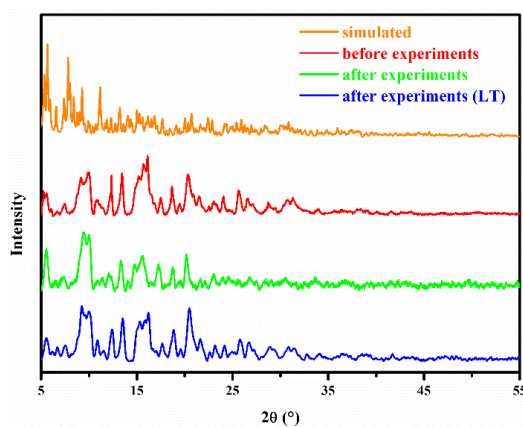

**Figure S30.** PXRD patterns of **SP1**. **LT** means the sample after proton conduction measurement in the temperature range  $-30^{\circ}\text{C}$  to  $+30^{\circ}\text{C}$ .



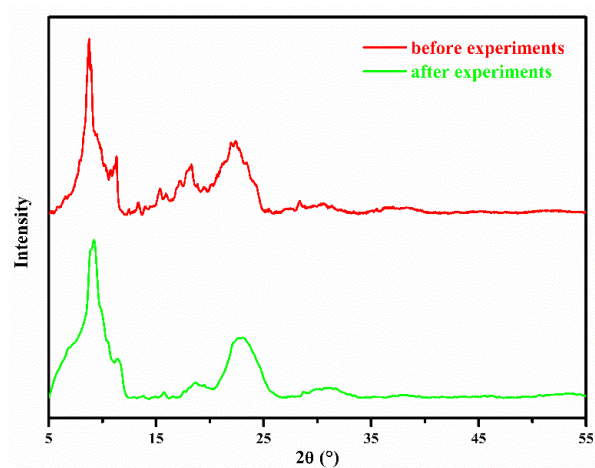

**Figure S31.** PXRD patterns of SP2.

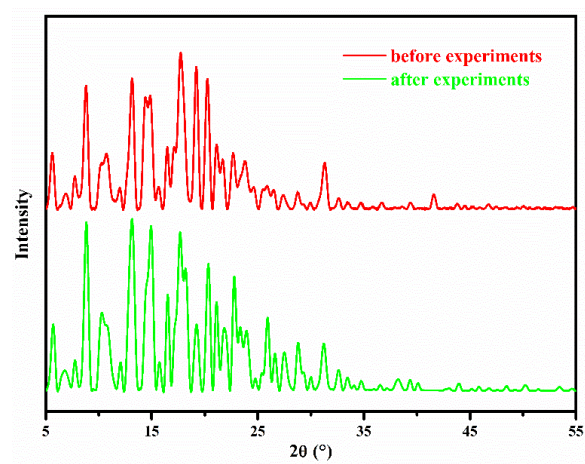

**Figure S32.** PXRD patterns of SP3.

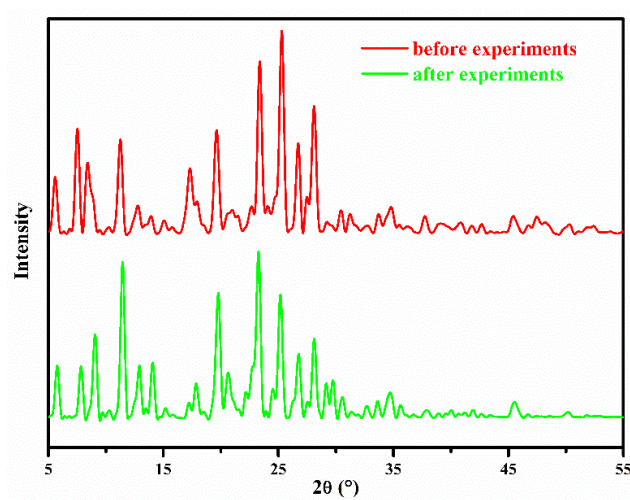

**Figure S33.** PXRD patterns of SP4.



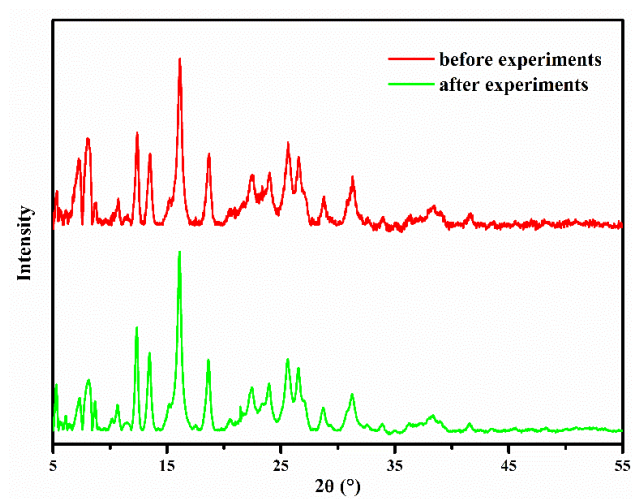

**Figure S34.** PXRD patterns of DNP@SP1.
